# Supplementary material
Source: Elsevier journal article supplement (https://www.sciencedirect.com/science/article/pii/S2238785418300449)
Supplement: mmc1 [file S2238785418300449:mmc1.docx]

**Photocatalytic performance of N-doped TiO2nano-SiO2-HY nanocomposites immobilized over cotton fabrics**

Salmon Landi Jr.a,b,*, Joaquim Carneiroa, Olivia S. G. P. Soaresc, Manuel F. R. Pereirac, Andreia C. Gomesd, Artur Ribeiroe, António M. Fonsecae,f, Pier Parpote,f and Isabel C. Nevese,f

aDepartment of Physics, University of Minho, Azurém Campus, Guimarães, 4800-058, Portugal

bInstituto Federal Goiano, 75901-970, Rio Verde, Goiás, Brazil

cLaboratory of Catalysis and Materials – Associate Laboratory LSRE/LCM, Faculty of Engineering, University of Porto, 4200-465, Porto, Portugal

dCentre of Molecular and Environmental Biology, University of Minho, 4710 – 057, Braga, Portugal

eCentre of Biological Engineering, University of Minho, 4710-057 Braga, Portugal

fCentre of Chemistry, Chemistry Department, University of Minho, Gualtar Campus, Braga, 4710-057, Portugal

*corresponding author. E-mail address: [salmon.landi@ifgoiano.edu.br](mailto:salmon.landi@ifgoiano.edu.br)

**Fig. S1.** FTIR spectrum of HY zeolite and some prepared composites. The dashed violet line denotes the wavenumber used to calculate the framework silicon/aluminium ratio of HY.


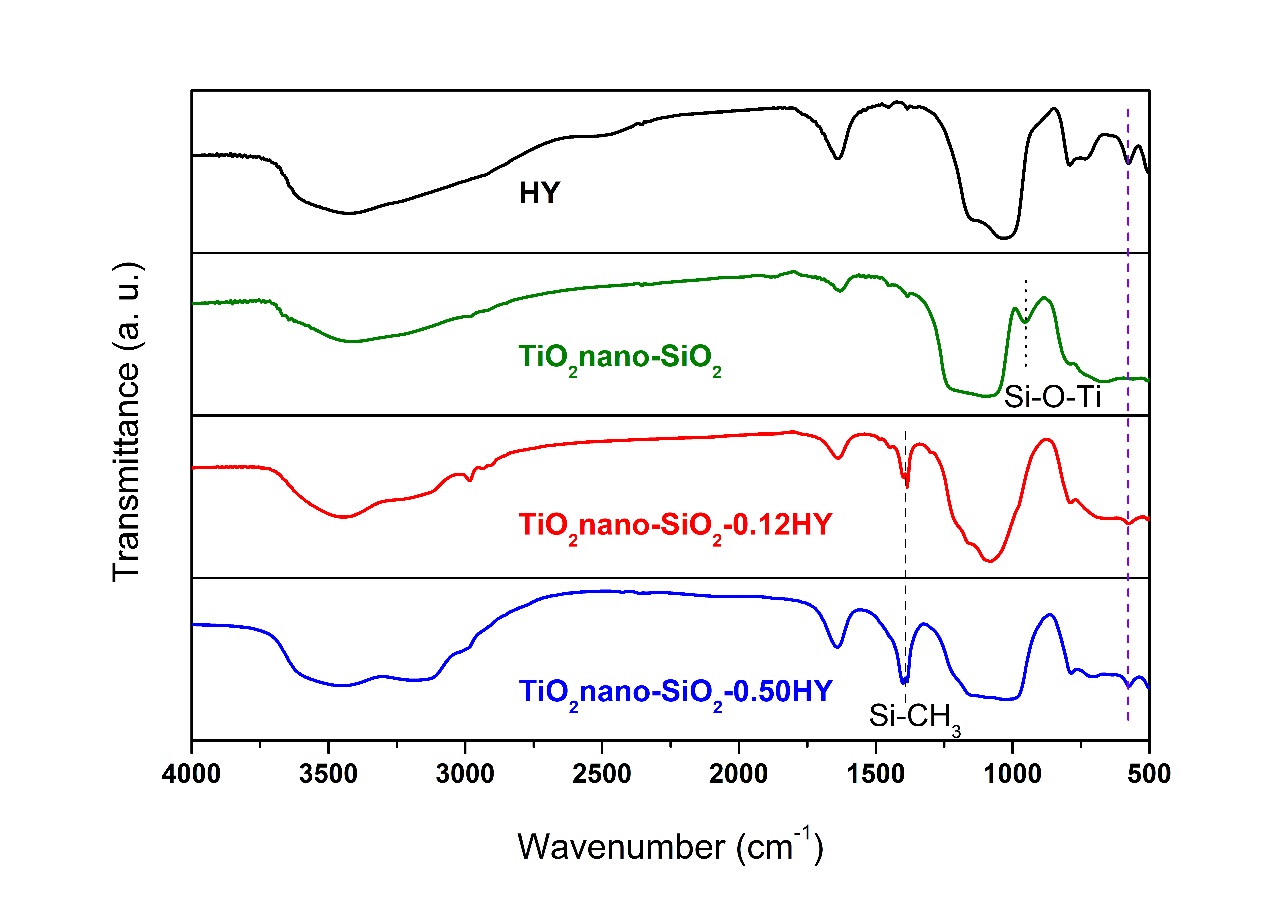


**Fig. S2.** X-ray diffraction pattern of HY zeolite compared to the patterns of other composites. The three specified peaks refer to those used to calculate the silicon/aluminium ratio of HY.

**
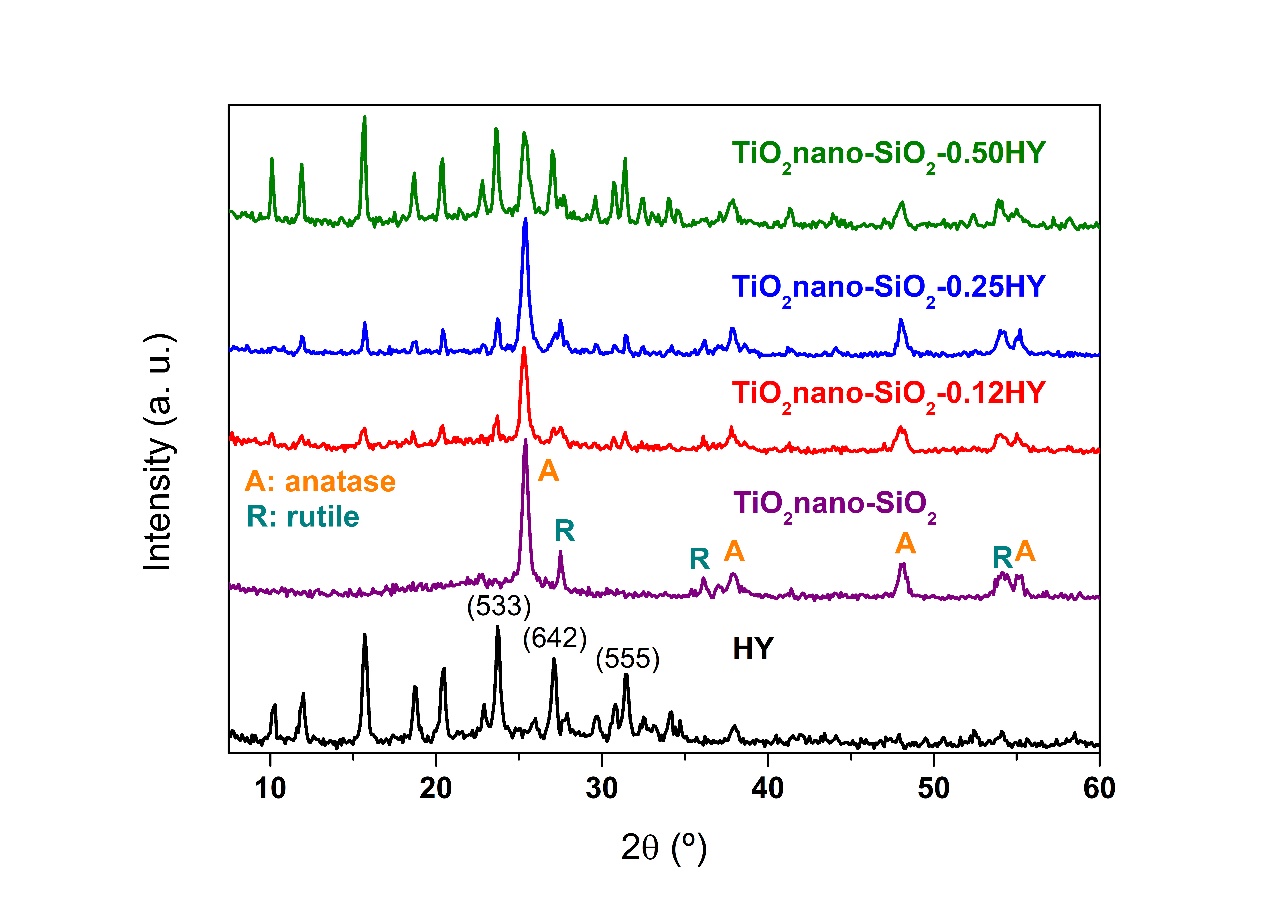
**

**Fig. S3.** Histogram of TiO2 nanoparticles concerning it size distribution. This histogram was obtained from the enlarged SEM micrograph shown in Fig. 2(d).

**
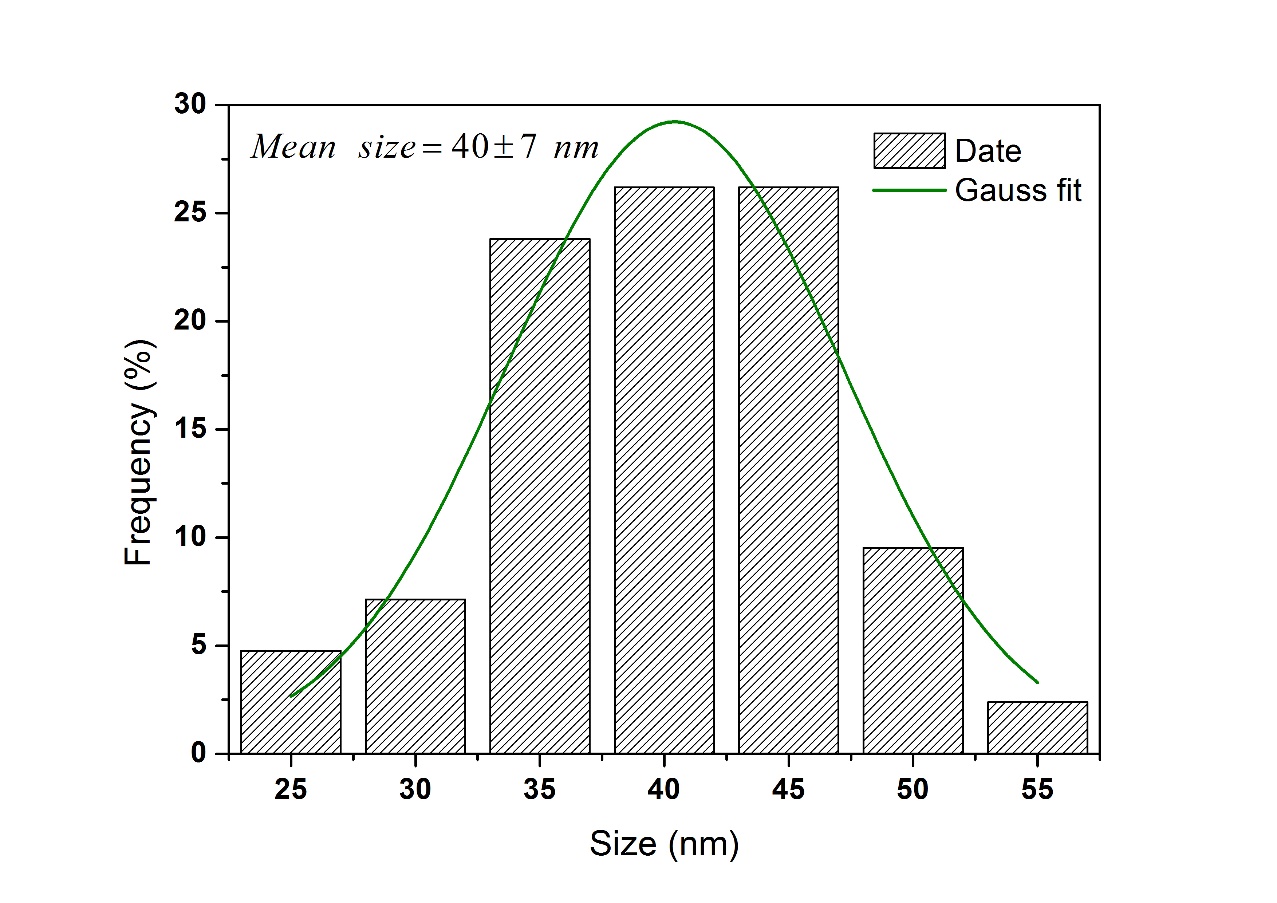
**
